# Supplementary material for: Role of Neuron-Specific Enolase in the Diagnosis and Disease Monitoring of Sarcoidosis
Source: Hindawi journal article supplement (doi:10.1155/2022/3726395), 2022-05-26
Supplement: f1 [file 3726395.f1.pdf]

Table S1. Characteristics of nonsarcoidotic patients in the present study.

| Disease                             | Number |
|-------------------------------------|--------|
| Nonsarcoidotic benign diseases      | 62     |
| Idiopathic interstitial pneumonia   | 37     |
| IPF                                 | 17     |
| NSIP                                | 12     |
| COP                                 | 5      |
| PPFE                                | 3      |
| Nontuberculous mycobacteria         | 5      |
| Tuberculous lymphadenitis           | 2      |
| Bacterial pneumonia                 | 4      |
| Other diseases                      | 14     |
| Pulmonary aspergillus               | 1      |
| Chronic bronchitis                  | 2      |
| Nonspecific lymphadenopathy         | 2      |
| Bronchial asthma                    | 1      |
| Spinal dural arteriovenous aneurysm | 1      |
| Spinal stenosis                     | 2      |
| Type 2 diabetes mellitus            | 1      |
| Trigeminal paralysis                | 1      |
| Degenerative spondylosis            | 3      |
| Small cell lung cancer              | 68     |

Table S2. Diagnostic significance of ACE and sIL-2R for sarcoidosis at the different cutoff points.

| Parameter | Cutoff value | No. of<br>SA/NS | <i>P</i> -value | Sensitivity | Specificity | PPV (%) | NPV (%) |
|-----------|--------------|-----------------|-----------------|-------------|-------------|---------|---------|
|           |              |                 |                 | (%)         | (%)         |         |         |
| ACE       | >21.4 IU/L   | 46/0            | <0.001          | 41.1        | 100         | 100     | 48.4    |
|           | ≤21.4 IU/L   | 66/62           |                 |             |             |         |         |
| ACE       | >14.5 IU/L   | 88/8            | <0.001          | 78.6        | 87.1        | 91.7    | 69.2    |
|           | ≤14.5 IU/L   | 24/54           |                 |             |             |         |         |
| sIL-2R    | >482 U/ml    | 85/26           | <0.001          | 84.2        | 53.6        | 76.6    | 65.2    |
|           | ≤482 U/ml    | 16/30           |                 |             |             |         |         |
| sIL-2R    | >581 U/ml    | 72/19           | <0.001          | 71.3        | 66.1        | 79.1    | 56.1    |
|           | ≤581 U/ml    | 29/37           |                 |             |             |         |         |

SA: sarcoidosis; NS: nonsarcoidosis; PPV: positive predictive value; NPV: negative predictive value.

Table S3. ROC analysis for NSE and ProGRP for diagnosis between SCLC and benign diseases.

| Parameter | AUC   | 95% CI      | <i>P</i> -value |
|-----------|-------|-------------|-----------------|
| NSE       | 0.867 | 0.806–0.927 | <0.001          |
| ProGRP    | 0.855 | 0.787–0.923 | <0.001          |

SCLC: small cell lung cancer; ROC: receiver operating characteristic; AUC: area under curve; CI: confidence interval.

Table S4. Cutoff value setting of NSE and ProGRP for differential diagnosis between SCLC and benign diseases.

| Parameter | Cutoff value | No. of<br>SCLC/benign | <i>P</i> -value | Sensitivity<br>(%) | Specificity<br>(%) | PPV (%) | NPV (%) |
|-----------|--------------|-----------------------|-----------------|--------------------|--------------------|---------|---------|
| NSE       | >12 ng/ml    | 58/73                 | <0.001          | 85.3               | 58.1               | 44.3    | 91.0    |
|           | ≤12 ng/ml    | 10/101                |                 |                    |                    |         |         |
| NSE       | >17 ng/ml    | 50/17                 | <0.001          | 73.5               | 90.2               | 74.6    | 89.7    |
|           | ≤17 ng/ml    | 18/157                |                 |                    |                    |         |         |
| ProGRP    | >80 pg/ml    | 47/9                  | <0.001          | 73.4               | 89.2               | 83.9    | 81.3    |
|           | ≤80 pg/ml    | 17/74                 |                 |                    |                    |         |         |

SCLC: small cell lung cancer; PPV: positive predictive value; NPV: negative predictive value.

**Fig. S1**

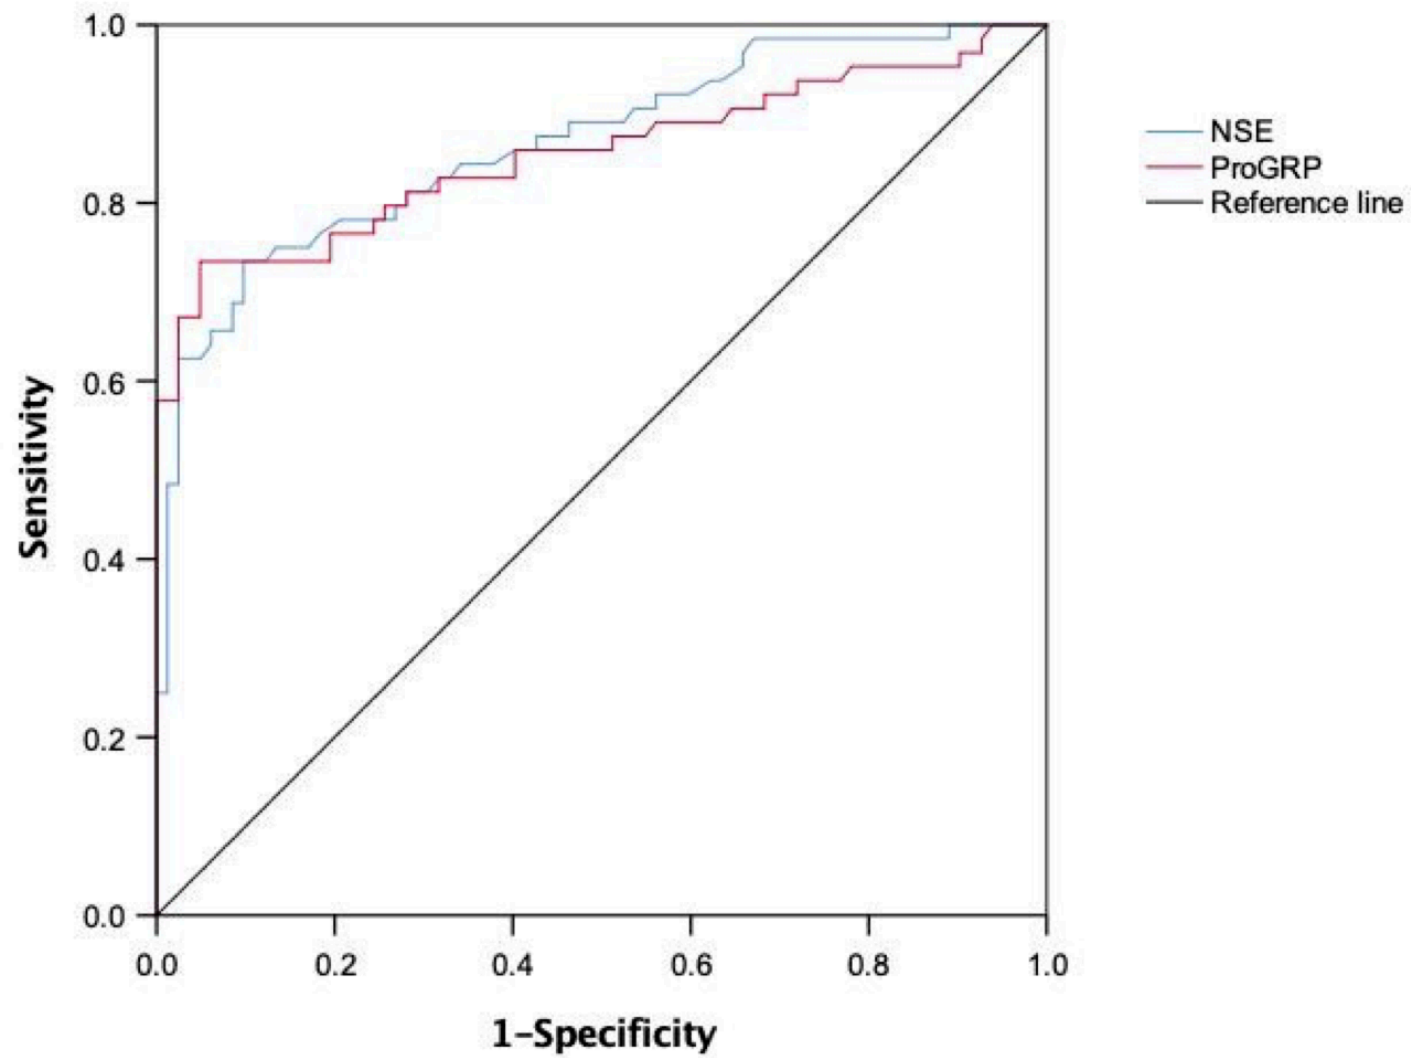

### **Supplementary Figure Legends**

**Figure S1.** ROC curves for NSE and ProGRP in patients with SCLC and benign diseases (sarcoidosis plus nonsarcoidotic diseases).
